# Supplementary material
Source: HighWire-hosted journal article supplement (http://ajnr-stage2.highwire.org/highwire/filestream/66773/field_highwire_adjunct_files/0/18-01128.pdf)
Supplement: 18-01128.pdf [file 18-01128.pdf]

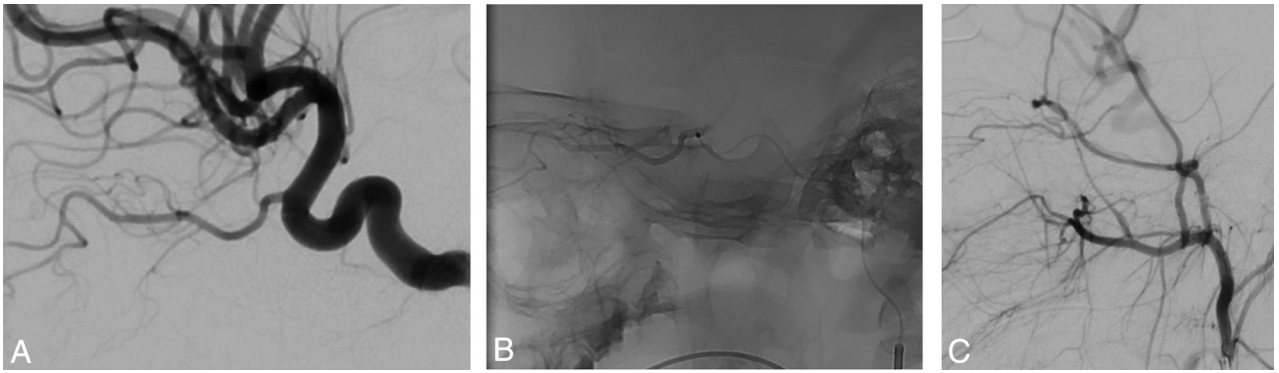

**ON-LINE FIGURE.** A, ICA angiogram showing normal OA anatomy. B, Unsubtracted OA microcatheter angiogram from an ostial position. C, Middle meningeal artery - OA anastomosis through an ethmoidal branch. Notice OA and ICA opacification through this ECA angiogram.
